# Supplementary material
Source: Royal Society of Chemistry journal article supplement (doi:10.1039/d6re00037a)
Supplement: d6re00037a1.pdf [file d6re00037a1.pdf]

## Supplementary Material

### Enhanced dark catalytic reduction of organic dyes and heavy-metal pollutants over activated carbon-supported V/S-BiOBr

Mengistu Tadesse Mosisa<sup>a, c</sup>, Samuel Ndaghiya Adawara<sup>a</sup>, Adugna Boke Abdeta<sup>d</sup>, Benjamin Kunkadma Inusa<sup>a</sup>,  
Cuizhu Li<sup>a</sup>, Haoyv Wang<sup>a</sup>, Kening Xiang<sup>a</sup>, Dong-Hau Kuo<sup>b</sup>, Jinguo Lin<sup>\*, a</sup>, Xiaoyun Chen<sup>\*, a</sup>

<sup>a</sup> College of Materials Engineering, Fujian Agriculture and Forestry University, Fuzhou 350002, China

<sup>b</sup> Department of Materials Science and Engineering, National Taiwan University of Science and Technology, Taipei  
106335, Taiwan

<sup>c</sup> Department of Chemical Engineering, Adama Science and Technology University, Adama, Ethiopia

<sup>d</sup> Department of Chemistry, Jimma University, Jimma, Ethiopia

\*Corresponding author

E-mail address: [fjlinjg@126.com](mailto:fjlinjg@126.com) (J. Lin)

E-mail address: [fjchenxy@126.com](mailto:fjchenxy@126.com) (X. Chen)

# CONTENTS

|                                                                                                                         |   |
|-------------------------------------------------------------------------------------------------------------------------|---|
| <b>1 Additional figures</b> .....                                                                                       | 3 |
| <b>Fig. S1</b> FTIR spectra of AC and V/S-BiOBr@AC .....                                                                | 3 |
| <b>Fig. S2</b> Reduction reactions of MO .....                                                                          | 3 |
| <b>Fig. S3</b> Reduction reactions of MB .....                                                                          | 4 |
| <b>Fig. S4</b> Reduction reactions of Cr (VI).....                                                                      | 4 |
| <b>2 Additional tables</b> .....                                                                                        | 5 |
| <b>Table S1</b> The chemical composition of catalysts measured by XPS .....                                             | 5 |
| <b>Table S2</b> Elements contents from XRF analysis .....                                                               | 5 |
| <b>Table S3</b> Elements contents from SEM-EDS.....                                                                     | 5 |
| <b>Table S4</b> <b>Table S4 Elemental composition of Activated carbon</b> .....                                         | 6 |
| <b>Table S5</b> Porosity and types of activated carbon used in the research .....                                       | 6 |
| <b>Table S6</b> Elemental composition and N <sub>2</sub> physisorption comparison of fresh and spent V/S-BiOBr@2AC..... | 6 |
| <b>Table S7</b> Comparison of V/S-BiOBr@2AC catalytic reduction activity with reported literature                       | 7 |
| <b>References</b> .....                                                                                                 | 8 |

## 1 Additional figures

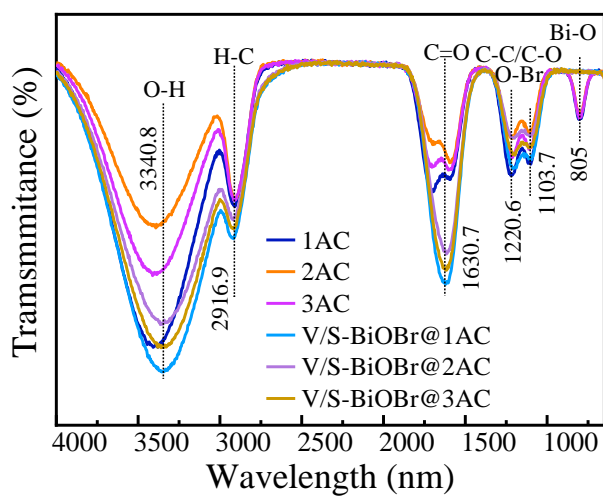

Fig.S1 FTIR spectra of 1AC, 2AC, 3AC, V/S-BiOBr@1AC, V/S-BiOBr@2AC, and V/S-BiOBr@3AC.

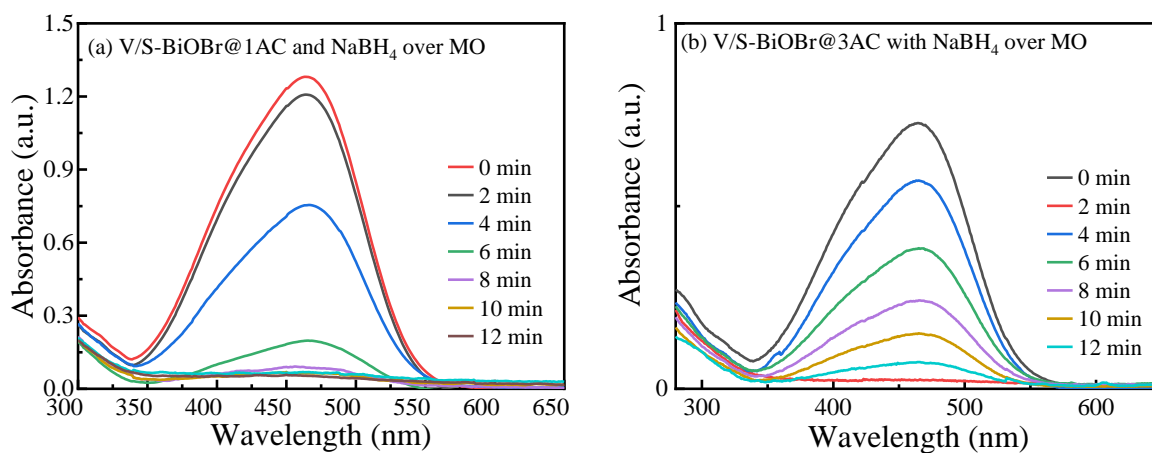

Fig. S2 Reduction of MO: (a) with V/S-BiOBr@1AC and NaBH<sub>4</sub>, (b) with V/S-BiOBr@3AC and NaBH<sub>4</sub>.

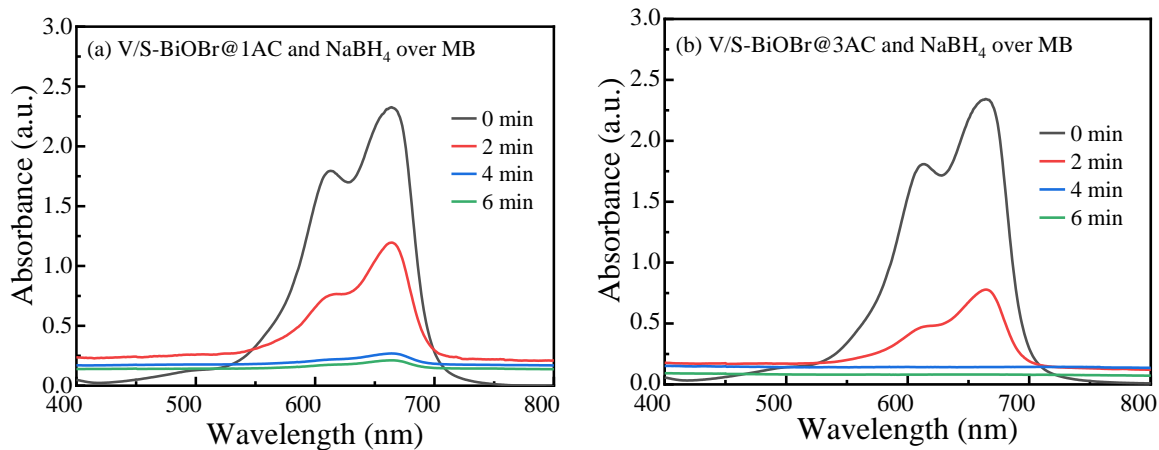

Fig. S3 Reduction of MB: (a) with V/S-BiOBr@1AC and NaBH<sub>4</sub>, (b) with V/S-BiOBr@3AC and NaBH<sub>4</sub>.

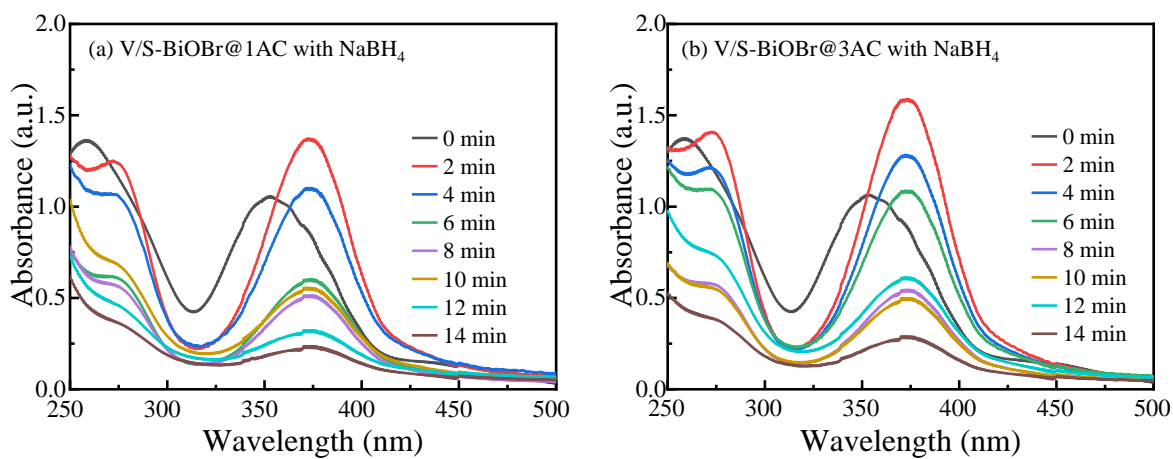

Fig. S4 Reduction of Cr(VI): (a) with V/S-BiOBr@1AC and NaBH<sub>4</sub>, (b) with V/S-BiOBr@3AC and NaBH<sub>4</sub>.

## 2 Additional tables

Table S1 XPS composition, oxygen vacancy ( $V_o$ ) content, crystallite size, and  $S_{BET}$  of V/S-BiOBr and V/S-BiOBr@2AC

| Catalyst                 | Atomic percentage (%) |      |      |      |      |      | $V^{4+}/(V^{4+}+V^{5+})$ (%) | $V_o$ (%) | Crystal size (nm) | $S_{BET}$ ( $m^2/g$ ) | Pore volume ( $cm^3/g$ ) |
|--------------------------|-----------------------|------|------|------|------|------|------------------------------|-----------|-------------------|-----------------------|--------------------------|
|                          | V                     | Bi   | O    | Br   | S    | C    |                              |           |                   |                       |                          |
| V/S-BiOBr                | 8.7                   | 34.6 | 22.6 | 17.3 | 14.1 | 2.7  | 36.6                         | 5.3       | 17.8              | 14                    | 0.148                    |
| V/S-BiOBr@2AC            | 8.6                   | 34.4 | 13.3 | 16.9 | 14.2 | 13.6 | 32.3                         | 15.5      | 25.7              | 42                    | 1.08                     |
| V/S-BiOBr@2AC after used | 8.5                   | 34.2 | 13.1 | 16.3 | 14.6 | 13.3 | 31.3                         | 19.6      | 25.6              | 42                    | 1.07                     |

Table S2 Element contents from SEM-EDS analysis for V/S-BiOBr and V/S-BiOBr@2AC

| Catalyst      | V   | Bi   | O    | Br   | S    | C    |
|---------------|-----|------|------|------|------|------|
| V/S-BiOBr     | 8.6 | 34.3 | 22.4 | 17.2 | 14.7 | 2.8  |
| V/S-BiOBr@2AC | 8.7 | 34.2 | 13.3 | 16.3 | 14.2 | 13.3 |

Table S3 XRF chemical element compositions of V/S-BiOBr and V/S-BiOBr@2AC

| Catalyst      | V   | Bi   | O    | Br   | S    | C    |
|---------------|-----|------|------|------|------|------|
| V/S-BiOBr     | 8.5 | 34.4 | 21.5 | 17.3 | 14.4 | 2.7  |
| V/S-BiOBr@2AC | 8.6 | 34.2 | 12.6 | 14.1 | 14.5 | 12.3 |

Table S4 Elemental composition of activated carbon

| Activated carbon type | Status           | C (%wt) | H (%wt)   | N (%wt)   | O (%wt) | Ash (% wt) |
|-----------------------|------------------|---------|-----------|-----------|---------|------------|
| Micro porous          | Fresh/commercial | 85±2    | 0.41±0.5  | 0.52±0.07 | 1±2     | 13±0.09    |
| Mesoporous            | Fresh/commercial | 84±2    | 0.47±0.06 | 0.54±0.08 | 1±2     | 12±0.08    |
| Micro-mesoporous      | Fresh/commercial | 85±2    | 0.43±0.08 | 0.52±0.09 | 1±2     | 13±0.09    |

Table S5 Porosity and types of activated carbon used in the research

| Types of Activated Carbon          | Surface area (m <sup>2</sup> /g) | Pore volume (cm <sup>3</sup> /g) |
|------------------------------------|----------------------------------|----------------------------------|
| Microporous activated carbon (1AC) | 1479                             | 1.05                             |
| Mesoporous activated carbon (2AC)  | 812                              | 1.45                             |
| Micro-meso activated carbon (3AC)  | 1413                             | 1.46                             |

Table S6 Elemental composition and N<sub>2</sub> physisorption comparison of fresh and spent V/S-BiOBr@2AC

| Sample              | Wt % |     |      |     |      | Retention % |    |    |    |    | m <sup>2</sup> /g | cm <sup>3</sup> /g |              |            |
|---------------------|------|-----|------|-----|------|-------------|----|----|----|----|-------------------|--------------------|--------------|------------|
|                     | V    | S   | Bi   | O   | Br   | V           | S  | Bi | O  | Br | S <sub>BET</sub>  | Pore in micro      | Pore in meso | Total pore |
| Fresh V/S-BiOBr@2AC | 2.1  | 1.8 | 38.5 | 8.4 | 17.6 | -           | -  | -  | -  | -  | 420               | 0.18               | 0.42         | 0.60       |
| Spent V/S-BiOBr@2AC | 2.0  | 1.7 | 37.4 | 8.1 | 16.9 | 94          | 92 | 97 | 96 | 96 | 398               | 0.16               | 0.39         | 0.55       |

Table S7 Comparison of V/S-BiOBr@2AC reduction of MB, MO, and Cr(VI) with reported literature

| Pollutants | Catalyst                                                           | Solution volume (mL) | NaBH <sub>4</sub> [mmol/L] | Catalyst dose (mg) | Time (min) | $k_{app}$ (min <sup>-1</sup> ) | $K$ (min/g) | Ref.      |
|------------|--------------------------------------------------------------------|----------------------|----------------------------|--------------------|------------|--------------------------------|-------------|-----------|
| MB         | Ce-BiOBr/Bi <sub>2</sub> S <sub>3</sub>                            | 100                  | 0.04                       | 5                  | 14         | 0.231                          | 23.1        | [1]       |
|            | Cu(MoO <sub>4</sub> ) <sub>2</sub> (OH) <sub>2</sub>               | 1000                 | 0.04                       | 5                  | 20         | 0.021                          | 2           | [2]       |
|            | Mn <sub>3</sub> O <sub>4</sub> /ZnO/AC)                            | 100                  | 0.01                       | 10                 | 20         | 0.03                           | 3           | [3]       |
|            | PANI@NiTiO <sub>3</sub>                                            | 100                  | 0.04                       | 50                 | 60         | 0.05                           | 5           | [4]       |
|            | MgO                                                                | 100                  | 0.04                       | 40                 | 60         | 0.02                           | 2           | [5]       |
|            | V/S-BiOBr@2AC                                                      | 100                  | 0.04                       | 5                  | 14         | 0.4383                         | 43.83       | This work |
| MO         | V/S-SnO <sub>2</sub>                                               | 100                  | 0.04                       | 20                 | 6          | 0.211                          | 21.1        | [6]       |
|            | V/O-Ag <sub>2</sub> S                                              | 100                  | 0.04                       | 20                 | 10         | 0.289                          | 28.9        | [7]       |
|            | Fe/S-BiOCl                                                         | 100                  | 0.04                       | 20                 | 14         | -                              | -           | [8]       |
|            | Co/S-CeO <sub>2</sub>                                              | 100                  | 0.04                       | 20                 | 10         | -                              | -           | [9]       |
|            | S-CoMoO <sub>4</sub> .0.9H <sub>2</sub> O                          | 100                  | 0.04                       | 10                 | 6          | -                              | -           | [10]      |
|            | V/S-BiOBr@2AC                                                      | 100                  | 0.04                       | 5                  | 6          | 0.4284                         | 42.84       | This work |
| Cr(IV)     | V/S-BiOBr                                                          | 100                  | 0.04                       | 5                  | 18         | 0.03                           | 3           | [11]      |
|            | Mn/O-Bi <sub>2</sub> S <sub>3</sub>                                | 100                  | 0.01                       | 10                 | 20         | 0.04                           | 4           | [12]      |
|            | Cu/Cu <sub>2</sub> O/NH <sub>2</sub> -MIL-88B(Fe)                  | 100                  | 0.05                       | 50                 | 20         | 0.05                           | 5           | [13]      |
|            | CsPbBr <sub>3</sub> /CdS                                           | 100                  | 0.01                       | 50                 | 30         | 0.07                           | 7           | [14]      |
|            | Cu <sub>3</sub> (MoO <sub>4</sub> ) <sub>2</sub> (OH) <sub>2</sub> | 100                  | 0.04                       | 10                 | 60         | 1.09                           | 109         | [2]       |
|            | MoSrOS                                                             | 100                  | 0.04                       | 5                  | 14         | 0.171                          | 17.1        | [15]      |
|            | O-Sn <sub>17</sub> Sb <sub>6</sub> S <sub>29</sub>                 | 100                  | 0.01                       | 10                 | 6          | 0.09                           | 9           | [16]      |
|            | La/O-SnS                                                           | 100                  | 0.01                       | 5                  | 18         | 0.364                          | 36.4        | [17]      |
|            | V/S-BiOBr@2AC                                                      | 100                  | 0.04                       | 5                  | 18         | 0.2178                         | 21.78       | This work |

## References:

- [1] Mosisa M T, Zhang P, Wu B, Chen L, Su Z, Li P, Zhang H, Farooq A, Huang T, Abdeta AB, Zelekew OA, Kuo DH, Lin J, Chen X, Lu D. Synthesis and characterization of Ce-BiOBr/Bi<sub>2</sub>S<sub>3</sub> catalyst with enhanced catalytic activity for organic dye reduction under dark, *J. Environ. Chem. Eng.*, 12 (2024) 113383.
- [2] Q. Wu, P. Zhang, D.-H. Kuo, B. Wu, A.B. Abdeta, Z. Su, L. Chen, O.A. Zelekew, J. Lin, X. Chen, Activation of Cu<sub>3</sub>(MoO<sub>4</sub>)<sub>2</sub>(OH)<sub>2</sub> with the hydrazine-driven cation reduction into a highly efficient catalyst for the reduction of organic dyes and heavy metals ion, *J. Environ. Chem. Eng.*, 11 (2023) 109974.
- [3] Nguyen, H. T.; Doan, V.-D.; Nguyen, T. L. H.; Nguyen, A.-T.; Tran, Q.-H.; Tran, V. A.; Le, V. T, Mechanistic pathway and optimization of rhodamine B degradation using Mn<sub>3</sub>O<sub>4</sub>/ZnO nanocomposite on microalgae-based carbon, *RSC Adv.*, 15 (2025) 6241-6259.
- [4] Abouri, M.; Benzaouak, A.; Elouardi, M.; El Hamdaoui, L.; Zaaboul, F.; Azzaoui, K.; Hammouti, B.; Sabbahi, R.; Jodeh, S.; El Belghiti, M. A.; El Hamidi, A, Enhanced photocatalytic degradation of Rhodamine B using polyaniline-coated XTiO<sub>3</sub> (X = Co, Ni) nanocomposites, *Sci. Rep.*, 15 (2025) 3595.
- [5] Gatou, M.-A.; Boval, N.; Lagopati, N.; Pavlatou, E. A, MgO nanoparticles as a promising photocatalyst towards rhodamine B and rhodamine 6G degradation, *Molecules*, 29 (2024) 4299.
- [6] Yang, B.; Wu, X.; Su, Z.; Insua, B. K.; Zhang, P.; Kuo, D.-H.; Gao, L.; Bao, X.; Lu, D.; Lin, J.; Chen, X, Heterovalent state and oxygen vacancy defect structure-associated V/S co-doped SnO<sub>2</sub>

for catalytic reduction of organic and Cr<sup>6+</sup> pollutants in the dark, *Adv. Sustain. Syst.*, 8 (2024) 2400429.

[7] Wu B, Su Z, Wu Q, Kuo DH, Zhang P, Chen L, Abdeta AB, Mosisa MT, Lin J, Chen X, Liu X. Mn/O co-doped Bi<sub>2</sub>S<sub>3</sub> bimetal oxysulfide catalyst for highly efficient reduction of organic and hexavalent chromium pollutants in the dark, *Mater. Today Chem.*, 33 (2023) 101697.

[8] Li, C.; Wang, H.; Liu, T.; Zhang, P.; Li, Q.; Xiang, K.; Kuo, D.-H.; Lu, D.; Mosisa, M. T.; Liao, Y.; Lin, J.; Chen, X, Fe/S co-doped BiOCl sulfur-oxychloride for efficient catalytic reduction of organic and Cr<sup>6+</sup>: synergistic regulation of heterovalent states and oxygen vacancy defects, *J. Water Process Eng.*, 75 (2025) 108093.

[9] Zhang, P.; Wang, H.; Lai, Y.; Xu, Y.; Chen, L.; Wu, Q.; Kuo, D.-H.; Lu, D.; Mosisa, M. T.; Li, J.; Lin, J.; Chen, X, Synergistic Co/S co-doped CeO<sub>2</sub> sulfur-oxide catalyst for efficient catalytic reduction of toxic organics and heavy metal pollutants under dark conditions, *J. Water Process Eng.*, 58 (2024) 104820.

[10] Zhang, P.; Wu, Q.; Wang, H.; Xu, Y.; Lai, Y.; Li, P.; Kuo, D.-H.; Huang, T.; Zhang, H.; Mosisa, M. T.; Li, J.; Lin, J.; Chen, X.; Lu, D, Hydrazine-driven cation valence regulation and oxygen defect engineering in sulfur-doped CoMoO<sub>4</sub>·0.9H<sub>2</sub>O for highly efficient reduction of toxic organics and hexavalent chromium under dark, *Mater. Today, Chem.*, 37 (2024) 102028.

[11] Mosisa, M. T.; Zhang, P.; Su, Z.; Wu, B.; Chen, L.; Liao, Y.; Farooq, A.; Lu, D.; Abdeta, A. B.; Kuo, D.-H.; Lin, J.; Chen, X, A novel V/S co-doped BiOBr catalyst for high-efficiency catalytic reduction of toxic organic and hexavalent chromium pollutants under dark, *J. Environ.*

*Chem. Eng.*, 12 (2024) 112111.

- [12] Wu, B.; Su, Z.; Wu, Q.; Kuo, D.-H.; Zhang, P.; Chen, L.; Abdeta, A. B.; Mosisa, M. T.; Lin, J.; Chen, X.; Liu, X, Mn/O co-doped Bi<sub>2</sub>S<sub>3</sub> bimetal oxysulfide catalyst for highly efficient reduction of organic and hexavalent chromium pollutants in the dark, *Mater. Today, Chem.*, 33 (2023) 101697.
- [13] Xu, C, Cu/Cu<sub>2</sub>O/NH<sub>2</sub>-MIL-88B(Fe) heterojunction as the photocatalyst to remove hexavalent chromium heavy metal ions in water, *RSC Adv.*, 15 (2025) 2462-2469.
- [14] Kipkorir, A.; DuBose, J.; Cho, J.; Kamat, P. V, CsPbBr<sub>3</sub>-CdS heterostructure: stabilizing perovskite nanocrystals for photocatalysis, *Chem. Sci.*, 12 (2021) 14815-14825.
- [15] Wu, Q.; Wang, X.; Fu, J.; Zelekew, O. A.; Abdeta, A. B.; Kuo, D.-H.; Zhang, J.; Yuan, Z.; Lin, J.; Chen, X, Wool-coiled bimetallic oxysulfide MoSrOS catalyst synthesis for catalytic reduction of toxic organic pollutants and heavy metal ions, *J. Sci. Adv. Mater. Devices*, 6 (2021) 578-586.
- [16] Huang, T.; Li, P.; Wu, Q.; Abdeta, A. B.; Kuo, D.-H.; Zhang, H.; Wu, B.; Mosisa, M. T.; Lin, J.; Chen, X.; Liu, X, Oxygen-doped Sn<sub>17</sub>Sb<sub>6</sub>S<sub>29</sub> bimetal oxysulfide catalysts for efficient reduction of organic pollutants and hexavalent chromium in the dark, *React. Chem. Eng.*, 9 (2024) 410-425.
- [17] Zhang, H.; Zhang, P.; Su, Z.; Kuo, D.-H.; Wu, Q.; Huang, T.; Li, P.; Mosisa, M. T.; Lin, J.; Chen, X.; Lu, D, Synergistic hydrogen peroxide-driven cation valence regulation and La/O co-doped SnS-based oxysulfide catalyst for efficient catalytic reduction of toxic organics and Cr (VI) under dark, *Adv. Sustain. Syst.*, 8 (2024) 2400212.
